# Supplementary material for: Secondary ossification center induces and protects growth plate structure
Source: eLife. 2020 Oct 16;9:e55212. doi: 10.7554/eLife.55212 (PMC7581430; doi:10.7554/eLife.55212)
Supplement: Source data 1. [file elife-55212-data1.xlsx]

## Sheet: Figure 2B
	wing	thumb	foot
M. lucifugus	0	0.5	0.25
A. jamaicensis	0	0.5	1
C. perspicillata	0	0.5	0.75
T. brasiliensis	0	0.5	0.75
M. austroriparius	0	0	0.386
P. pipistrellus	0	0.525	0.615
M. myotis	0	0.415	0.57

## Sheet: Figure 2C
	wing	leg
M. lucifugus	0	0
A. jamaicensis	0	0.75
C. perspicillata	0	0.5
T. brasiliensis	0.636667	0.696667
M. austroriparius	0.193333	0.136667
P. pipistrellus	0.44	0.4
M. myotis	0.293333	0.296667

## Sheet: Figure 2D
	wing
prenatal	0	0	0	0	0.25	0	0	0	0	0	0	0	0	0	0	0	0	0	0	0	0	0	0	0	0	0	0	0	0	0	0	0	0	0	0	0	0	0	0	0	0	0	0	0	0	0	0	0	0
at birth	0	0	0	0	0.5	0	0	0	0	0	0	0	0	0.5	0	0	0	0	0	0	0	0	0.5	0	0	0	0	0	0	0	0	0.71	0	0	0	0	0	0	0	0	0	0	0	0	0	0	0	0	0
postnatal	0.55	0.55	0.55	0.55	1	0.48	0.48	0.48	0.48	0.48	0.48	0.48	0.48	0.75	0.66	0.66	0.66	0.66	0.23	0.23	0.23	0.23	0.75	0.21	0.21	0.21	0.21	0.5	0.5	0.5	0.5	1	0.5	0.5	0.5	0.5	0.5	0.5	0.5	0.5	1	0.5	0.5	0.5	0.5	0	0.27	0.25	0.2
adult	1	1	1	1	1	1	1	1	1	1	1	1	1	1	1	1	1	1	1	1	1	1	1	1	1	1	1	1	1	1	1	1	1	1	1	1	1	1	1	1	1	1	1	1	1	1	1	1	1
[truncated: 77 more columns]

## Sheet: Figure 2E
	wing																				leg
prenatal	0	0	0	0	0	0	0	0	0	0	0	0	0	0	0	0	0	0			0	0	0	0.75	0.75	0.75	0	0	0	0	0	0	0	0	0	0	0	0
at birth	0	0	0	0	0	0	0	0	0	0.76	0.47	0.68	0.25	0.11	0.22	0.21	0.3	0.37			0	0	0	0.75	0.75	0.75	0.5	0.5	0.5	0.75	0.73	0.61	0.25	0.11	0.05	0.53	0.36	0
postnatal	0.5	0.67	0.5	0.5	0.5	0.5	0.5	0.5	0.5	0.76	0.75	1	0.5	0.5	0.5	0.8	0.16	0.8			0.5	0.5	0.5	0.75	0.75	0.75	0.75	0.75	0.75	0.75	0.75	0.75	0.75	0.75	0.75	0.4	0.64	0.75
adult	1	1	1	1	1	1	1	1	1	1	1	1	1	1	1	1	1	1			1	1	1	1	1	1	1	1	1	1	1	1	1	1	1	1	1	1

## Sheet: Figure 3Q
	Frontal limbs																		Hindlimbs
P7	0	0	0	0.267684	0	0	0	0	0										0	0	0	0	0	0	0	0	0	0
P14	0.779005	0.535457	0.569468	0.581337	0.661614	0.758516	0.614486	0.640689	0.613432	0.784873									0	0	0	0	0	0	0	0	0
P21	1	0.876399	0.907666	0.926144	1														0.386046	0.349766	0.538995
P28	1	1	1	1	1	1	1	1	1										1	1	1	1	1	1

## Sheet: Figure 3R
	Frontal limbs									Hindlimbs
P7	0.108991	0.117007	0.2066	0.070188	0.112344	0.205106				0	0	0	0	0	0	0
P14	1	1	0.696526	1	1	0.500007				0.23562	0.417886	0.425792	0.166011	0.308761	0.201049	0.314607	0.261165
P21	1	1	1							0.573418	0.628879	0.656148	0.53124
P28	1	1	1	1	1	1				1	1	1	1	1	1	1	1	1

## Sheet: Figure 5A
	tibia with SOC						tibia without SOC
0.5	1.53	1.08	0.98				2.75	2.93	3.04	3.86	2.96	2.97
1	1.62	1.54	1.46				34.73	38.28	38.1	33.22	38.5	36.96
1.5	1.23	1.84	2.01				72.34	85.31	81.58	71.22	86.74	81.5
2	2.35	2.14	2.84				87.06	85.87	86.76	85.24	86.83	83.9
3	9.06	10.52	9.7	9.4	10.5	10.23
5	29.72	31.18	34.41	30.16	31.56	33.24
7	35.61	31.78	31.22	36.98	32.09	30.09

## Sheet: Figure 5B
	tibia with SOC						tibia without SOC
0.5	1.23	1.12	1.26				3.57	3.21	3.75	3.68	3.22	3.76
1	1.56	1.58	1.67				45	43.58	41.09	47.85	43.42	40.67
1.5	2.01	1.63	1.48				66.19	70.57	71.58	66.92	69.92	71.25
2	2.13	2.15	2.65				88.12	86.31	81.62	86.24	84.66	83.64
3	11.06	10.75	11.14	11.09	10.96	10.98
5	16	16.16	16.27	16.08	16.53	16.06
7	33.24	34.8	25.58	34.15	35.54	25.5

## Sheet: Figure 5C
	tibia with SOC						tibia without SOC
0			1.19	0.99	1.57		0.82	1.27	3.92
1.5							31.43	38.22	33.74	29.66	37.74	33.97
2							29.02	51.67	46.17	28.68	52.19	46.11
5	21	15.15	24.71	16.89	16.57	17.32
7	31.72	34.23	33.18	31.45	34.31	33.25

## Sheet: Figure 5D
	tibia with SOC						tibia without SOC
0	1.73	1.51	1.38				2.19	2.53	2.65
1.5							31.59	33.89	41.07	30.7	33.14	39.67
2							33.19	37.12	37.81	33.9	37.17	37.54
5	11.01	16.05	17	10.48	12.25	11.14
7	56.79	48.5	44.48	56.47	48.45	44.49

[truncated: 33 more sheets: Figure 5E, Figure 5F, Figure 6A, Figure 6B, Figure 6C, Figure 6D, Figure 6E, Figure 6F, Figure 6G, Figure 6H, Figure 6I, Figure 7C, Figure 7D, Figure 7E, Figure 7F, Figure 7G, Figure 8B, Figure 8D, Figure 8E, Figure 8 …]
